# Supplementary material
Source: HighWire-hosted journal article supplement (http://molpharm.aspetjournals.org/highwire/filestream/76485/field_highwire_adjunct_files/0/SupFig1.pdf)

**A**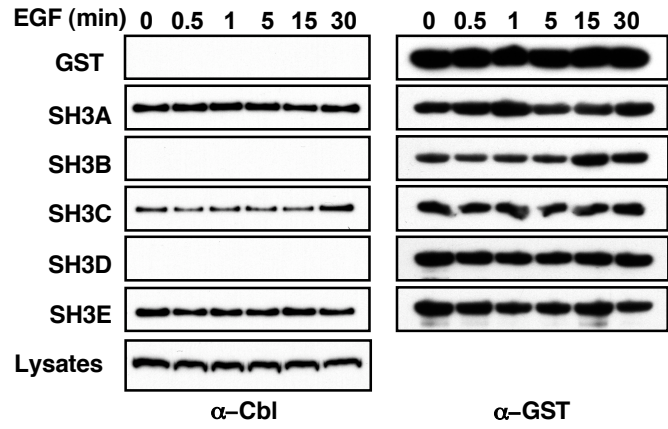**B**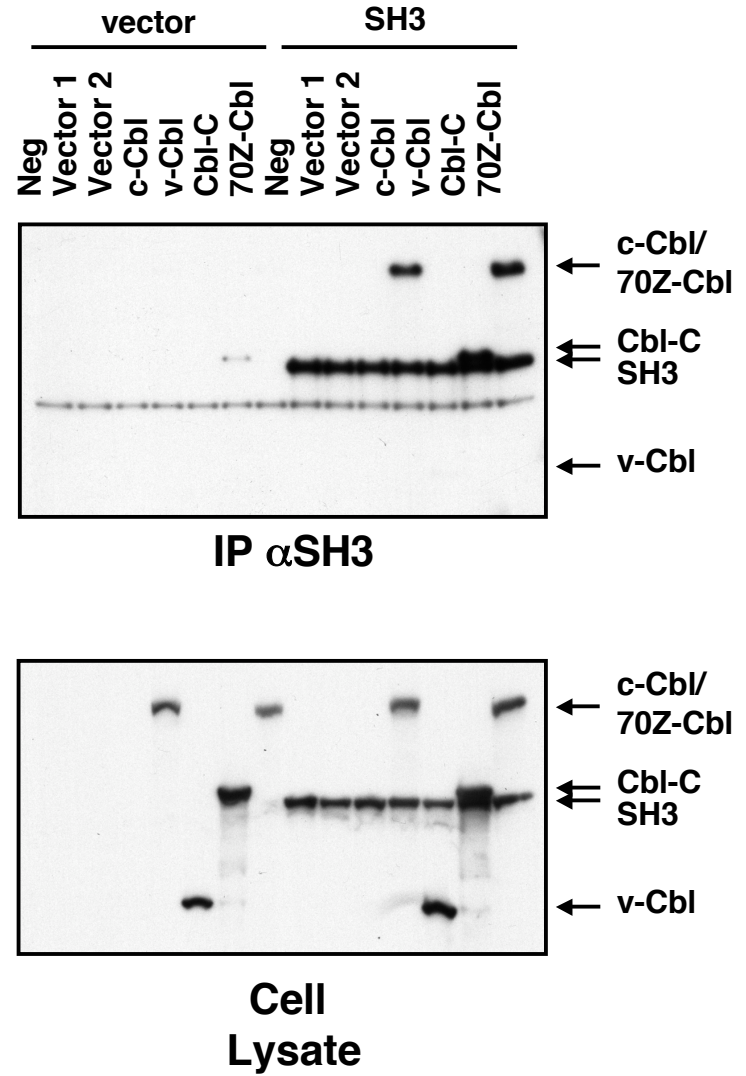**C**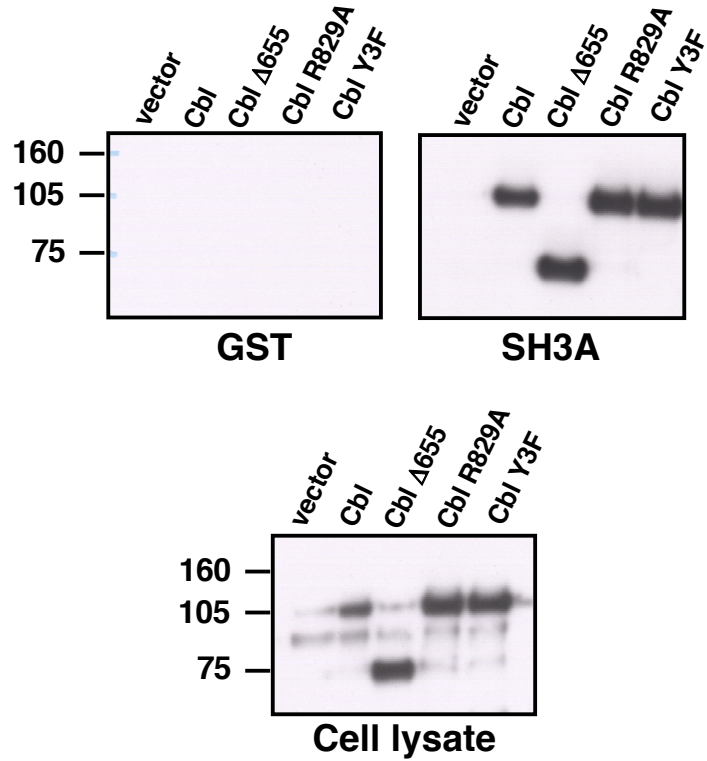

Supplement: SupFig1.pdf [file SupFig1.pdf]
